# Supplementary material
Source: Royal Society of Chemistry journal article supplement (doi:10.1039/d6rp00083e)

## Supplementary Information (SI)

### Appendix 1: Table A

#### *Edge-Weight (Female)*

| Female   |       |       |       |       |       |       |       |       |       |       |       |       |
|----------|-------|-------|-------|-------|-------|-------|-------|-------|-------|-------|-------|-------|
| ESE Item | CU1   | CU2   | CU3   | LH1   | LH2   | LH3   | PC1   | PC2   | PC3   | SR1   | SR2   | SR3   |
| CU1      | 0.000 | 0.106 | 0.348 | 0.024 | 0.000 | 0.000 | 0.135 | 0.093 | 0.082 | 0.007 | 0.105 | 0.000 |
| CU2      | 0.106 | 0.000 | 0.315 | 0.000 | 0.000 | 0.204 | 0.000 | 0.000 | 0.000 | 0.023 | 0.000 | 0.011 |
| CU3      | 0.348 | 0.315 | 0.000 | 0.000 | 0.000 | 0.003 | 0.153 | 0.106 | 0.126 | 0.000 | 0.056 | 0.000 |
| LH1      | 0.024 | 0.000 | 0.000 | 0.000 | 0.407 | 0.212 | 0.000 | 0.043 | 0.112 | 0.011 | 0.030 | 0.039 |
| LH2      | 0.000 | 0.000 | 0.000 | 0.407 | 0.000 | 0.408 | 0.000 | 0.046 | 0.024 | 0.079 | 0.000 | 0.011 |
| LH3      | 0.000 | 0.204 | 0.003 | 0.212 | 0.408 | 0.000 | 0.037 | 0.000 | 0.007 | 0.000 | 0.000 | 0.000 |
| PC1      | 0.135 | 0.000 | 0.153 | 0.000 | 0.000 | 0.037 | 0.000 | 0.260 | 0.135 | 0.058 | 0.000 | 0.073 |
| PC2      | 0.093 | 0.000 | 0.106 | 0.043 | 0.046 | 0.000 | 0.260 | 0.000 | 0.318 | 0.000 | 0.000 | 0.160 |
| PC3      | 0.082 | 0.000 | 0.126 | 0.112 | 0.024 | 0.007 | 0.135 | 0.318 | 0.000 | 0.095 | 0.092 | 0.052 |
| SR1      | 0.007 | 0.023 | 0.000 | 0.011 | 0.079 | 0.000 | 0.058 | 0.000 | 0.095 | 0.000 | 0.404 | 0.055 |
| SR2      | 0.105 | 0.000 | 0.056 | 0.030 | 0.000 | 0.000 | 0.000 | 0.000 | 0.092 | 0.404 | 0.000 | 0.373 |
| SR3      | 0.000 | 0.011 | 0.000 | 0.039 | 0.011 | 0.000 | 0.073 | 0.160 | 0.052 | 0.055 | 0.373 | 0.000 |

CU = conceptual understanding; LH = laboratory hazards; PC = procedural complexity; SR = sufficiency of resources

## Supplementary Information (SI)

### Appendix 2: Table B

#### *Edge-Weight (Male)*

| ESE Item | Male  |       |       |       |       |       |       |       |       |       |       |       |
|----------|-------|-------|-------|-------|-------|-------|-------|-------|-------|-------|-------|-------|
|          | CU1   | CU2   | CU3   | LH1   | LH2   | LH3   | PC1   | PC2   | PC3   | SR1   | SR2   | SR3   |
| CU1      | 0.000 | 0.138 | 0.368 | 0.015 | 0.130 | 0.020 | 0.039 | 0.060 | 0.155 | 0.000 | 0.000 | 0.062 |
| CU2      | 0.138 | 0.000 | 0.180 | 0.017 | 0.000 | 0.154 | 0.000 | 0.079 | 0.000 | 0.123 | 0.000 | 0.000 |
| CU3      | 0.368 | 0.180 | 0.000 | 0.000 | 0.000 | 0.000 | 0.117 | 0.114 | 0.106 | 0.000 | 0.032 | 0.152 |
| LH1      | 0.015 | 0.017 | 0.000 | 0.000 | 0.464 | 0.243 | 0.000 | 0.000 | 0.000 | 0.001 | 0.000 | 0.063 |
| LH2      | 0.130 | 0.000 | 0.000 | 0.464 | 0.000 | 0.223 | 0.139 | 0.014 | 0.000 | 0.151 | 0.037 | 0.043 |
| LH3      | 0.020 | 0.154 | 0.000 | 0.243 | 0.223 | 0.000 | 0.031 | 0.023 | 0.000 | 0.000 | 0.000 | 0.000 |
| PC1      | 0.039 | 0.000 | 0.117 | 0.000 | 0.139 | 0.031 | 0.000 | 0.269 | 0.000 | 0.056 | 0.012 | 0.000 |
| PC2      | 0.060 | 0.079 | 0.114 | 0.000 | 0.014 | 0.023 | 0.269 | 0.000 | 0.522 | 0.000 | 0.019 | 0.005 |
| PC3      | 0.155 | 0.000 | 0.106 | 0.000 | 0.000 | 0.000 | 0.000 | 0.522 | 0.000 | 0.081 | 0.129 | 0.000 |
| SR1      | 0.000 | 0.123 | 0.000 | 0.001 | 0.151 | 0.000 | 0.056 | 0.000 | 0.081 | 0.000 | 0.225 | 0.188 |
| SR2      | 0.000 | 0.000 | 0.032 | 0.000 | 0.037 | 0.000 | 0.012 | 0.019 | 0.129 | 0.225 | 0.000 | 0.386 |
| SR3      | 0.062 | 0.000 | 0.152 | 0.063 | 0.043 | 0.000 | 0.000 | 0.005 | 0.000 | 0.188 | 0.386 | 0.000 |

CU = conceptual understanding; LH = laboratory hazards; PC = procedural complexity; SR = sufficiency of resources

## Supplementary Information (SI)

### Appendix 3: Table C

#### *Centrality Indices for ESE Items in Female and Male Networks*

| ESE Item | Female      |           |          |                    | Male        |           |          |                    |
|----------|-------------|-----------|----------|--------------------|-------------|-----------|----------|--------------------|
|          | Betweenness | Closeness | Strength | Expected influence | Betweenness | Closeness | Strength | Expected influence |
| CU1      | -0.074      | 0.756     | -0.039   | -0.039             | -0.231      | 1.052     | 0.511    | 0.511              |
| CU2      | 0.517       | 0.290     | -1.764   | -1.764             | -0.924      | -0.505    | -1.177   | -1.177             |
| CU3      | 1.992       | 1.614     | 1.430    | 1.430              | 0.231       | 1.598     | 0.980    | 0.980              |
| LH1      | -0.664      | -1.083    | -0.206   | -0.206             | -1.155      | -0.339    | -0.534   | -0.534             |
| LH2      | -0.369      | -0.427    | 0.496    | 0.496              | 2.773       | 1.784     | 1.729    | 1.729              |
| LH3      | 0.221       | -0.768    | -0.255   | -0.255             | -0.693      | -1.713    | -1.165   | -1.165             |
| PC1      | -1.845      | -0.061    | -0.400   | -0.400             | 0.231       | -0.456    | -1.340   | -1.340             |
| PC2      | 0.221       | 0.919     | 0.852    | 0.852              | 0.000       | -0.134    | 1.177    | 1.177              |
| PC3      | -0.369      | 1.478     | 0.971    | 0.971              | 0.000       | -0.283    | 0.550    | 0.550              |
| SR1      | -0.369      | -1.015    | -1.237   | -1.237             | 0.462       | -0.115    | -0.408   | -0.408             |
| SR2      | 1.402       | -0.476    | 1.105    | 1.105              | -0.231      | -0.186    | -0.329   | -0.329             |
| SR3      | -0.664      | -1.227    | -0.953   | -0.953             | -0.462      | -0.704    | 0.007    | 0.007              |

CU = conceptual understanding; LH = laboratory hazards; PC = procedural complexity; SR = sufficiency of resources

## Supplementary Information (SI)

### Appendix 4: Figure A

Female ESE Network Robustness Results: Bootstrapped Edge-Weight Confidence Intervals (Left) and Centrality Stability Curves (Right)

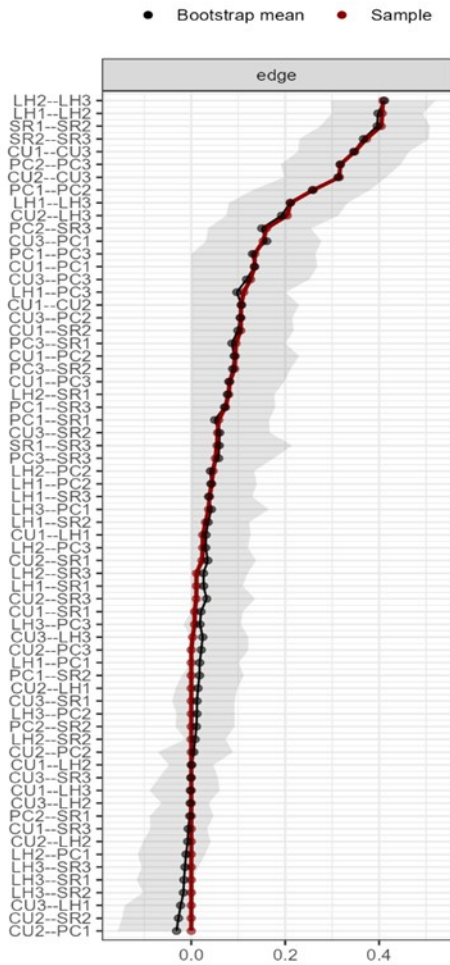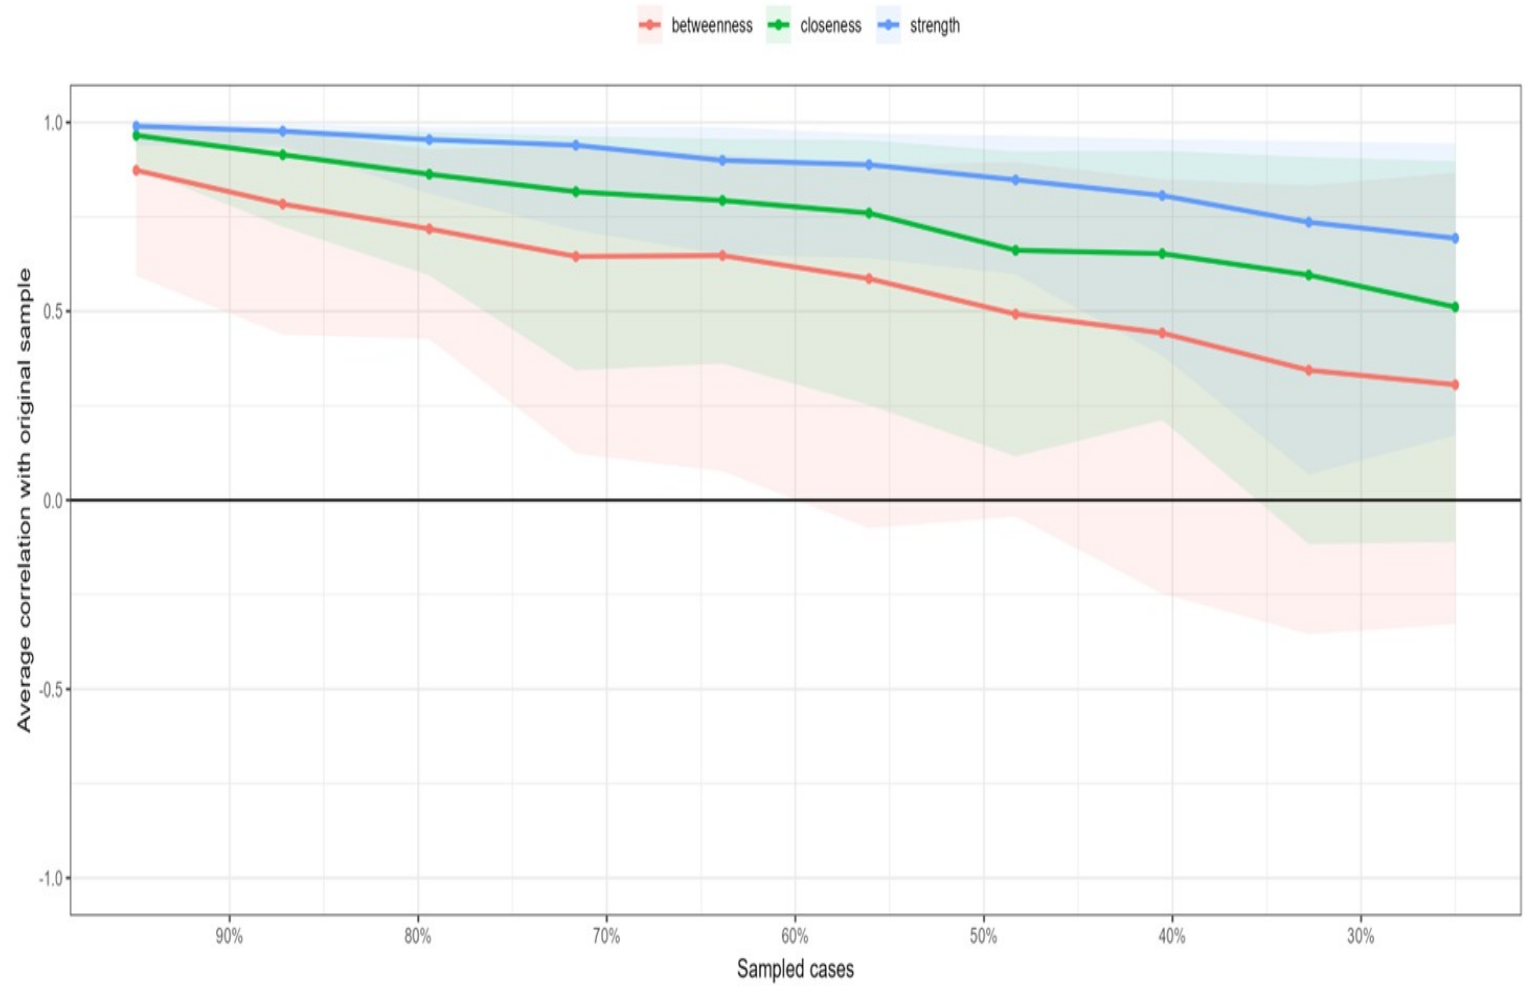

## Supplementary Information (SI)

### Appendix 5: Figure B

Male ESE Network Robustness Results: Bootstrapped Edge-Weight Confidence Intervals (Left) and Centrality Stability Curves (Right)

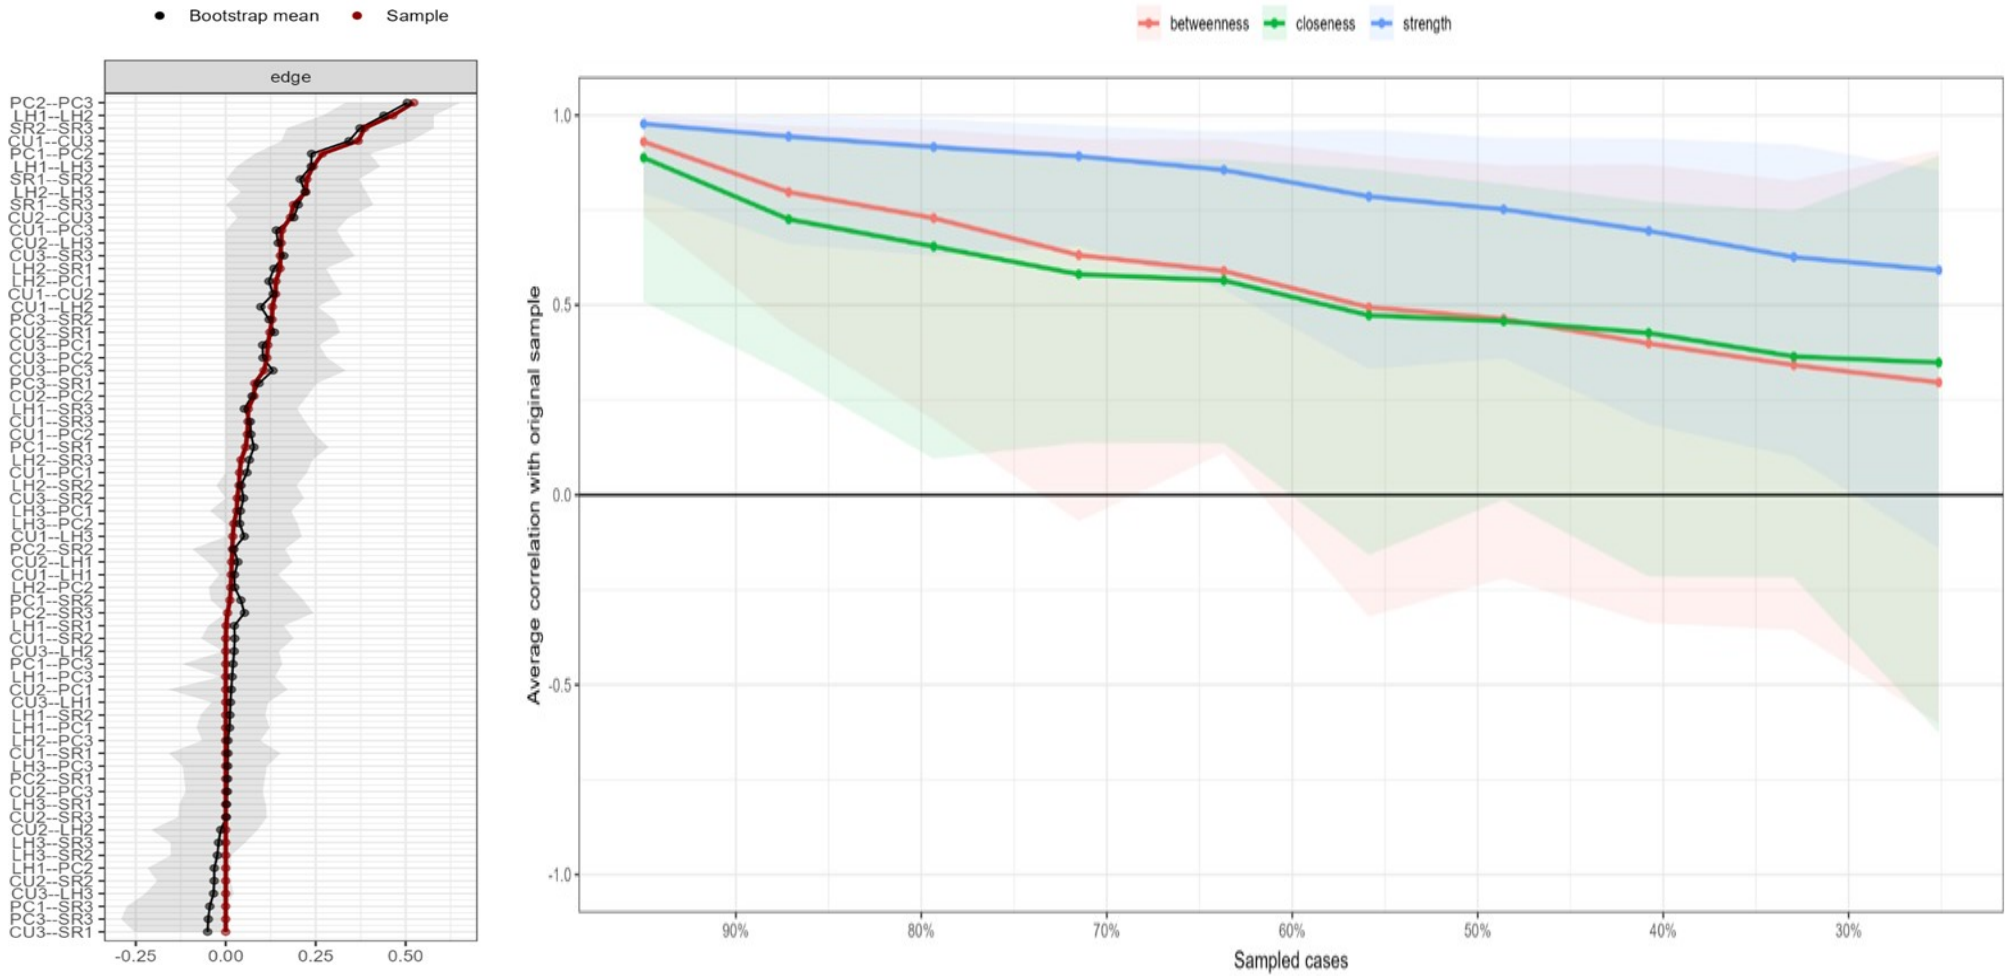

Supplement: d6rp00083e1.pdf [file d6rp00083e1.pdf]
